# Supplementary material for: Integrative Taxonomy of Armeria Taxa (Plumbaginaceae) Endemic to Sardinia and Corsica
Source: MDPI journal article supplement (doi:10.3390/plants12112229), 2023-06-05
Supplement: s1 [file s1]

**Table S1.** Mean and standard deviation of the karyological parameters in *Armeria* taxa endemic to Sardinia and Corsica. Indices names as in the main text; population codes as in Table 1; n = number of studied metaphasic plates; THL = Total Haploid (monoploid) Length, M<sub>CA</sub> = Mean Centromeric Asymmetry; CV<sub>CL</sub> = Coefficient of Variation of Chromosome Length; CV<sub>CI</sub> = Coefficient of Variation of Centromere Index. m = total number of chromosomes with centromere in median position; sm = total number of chromosomes with centromere in submedian position; st = total number of chromosomes with centromere in subterminal position.

| Population | n  | THL (μm)      | M <sub>CA</sub> | CV <sub>CL</sub> | CV <sub>CI</sub> | m   | sm  | st |
|------------|----|---------------|-----------------|------------------|------------------|-----|-----|----|
| AR         | 6  | 42.21 ± 5.15  | 15.31 ± 1.43    | 17.40 ± 3.62     | 27.90 ± 2.04     | 46  | 62  | 0  |
| BI         | 7  | 37.2 ± 4.44   | 12.1 ± 1.60     | 18.3 ± 2.03      | 22.8 ± 2.51      | 76  | 50  | 0  |
| BS         | 12 | 38.25 ± 5.76  | 12.55 ± 1.87    | 15.52 ± 1.67     | 25.67 ± 2.54     | 104 | 113 | 0  |
| BU         | 5  | 46.89 ± 10.31 | 15.02 ± 3.61    | 19.25 ± 3.57     | 26.65 ± 3.14     | 44  | 47  | 1  |
| CB         | 9  | 36.81 ± 4.61  | 13.34 ± 2.47    | 17.26 ± 2.65     | 22.85 ± 1.63     | 88  | 76  | 0  |
| FO         | 5  | 42.16 ± 6.08  | 11.53 ± 1.08    | 17.35 ± 1.20     | 25.35 ± 3.37     | 38  | 52  | 0  |
| GO         | 4  | 45.25 ± 7.77  | 14.09 ± 1.69    | 17.55 ± 1.20     | 24.35 ± 2.98     | 38  | 34  | 0  |
| MCA        | 7  | 44.07 ± 8.61  | 15.79 ± 1.93    | 16.48 ± 1.21     | 22.29 ± 2.50     | 73  | 52  | 0  |
| ML         | 4  | 37.66 ± 5.94  | 14.80 ± 3.18    | 20.00 ± 3.33     | 23.49 ± 2.52     | 40  | 31  | 0  |
| MO         | 8  | 43.59 ± 6.16  | 13.59 ± 1.85    | 18.68 ± 1.09     | 27.52 ± 2.02     | 60  | 83  | 1  |
| MR         | 5  | 38.40 ± 12.85 | 15.60 ± 3.75    | 17.38 ± 3.09     | 22.44 ± 5.56     | 52  | 38  | 0  |
| MS         | 5  | 39.22 ± 5.83  | 13.32 ± 1.11    | 17.46 ± 1.47     | 21.72 ± 1.84     | 58  | 32  | 0  |
| RE         | 12 | 43.47 ± 4.21  | 15.08 ± 1.99    | 16.42 ± 1.34     | 24.10 ± 1.85     | 111 | 106 | 1  |
| SP         | 4  | 41.8 ± 5.05   | 14.8 ± 1.87     | 19.7 ± 3.18      | 24.8 ± 2.88      | 38  | 35  | 1  |
| TH         | 5  | 50.9 ± 8.18   | 13.7 ± 1.10     | 19.8 ± 2.52      | 27.7 ± 2.62      | 36  | 54  | 0  |
| Total      | 91 |               |                 |                  |                  |     |     |    |

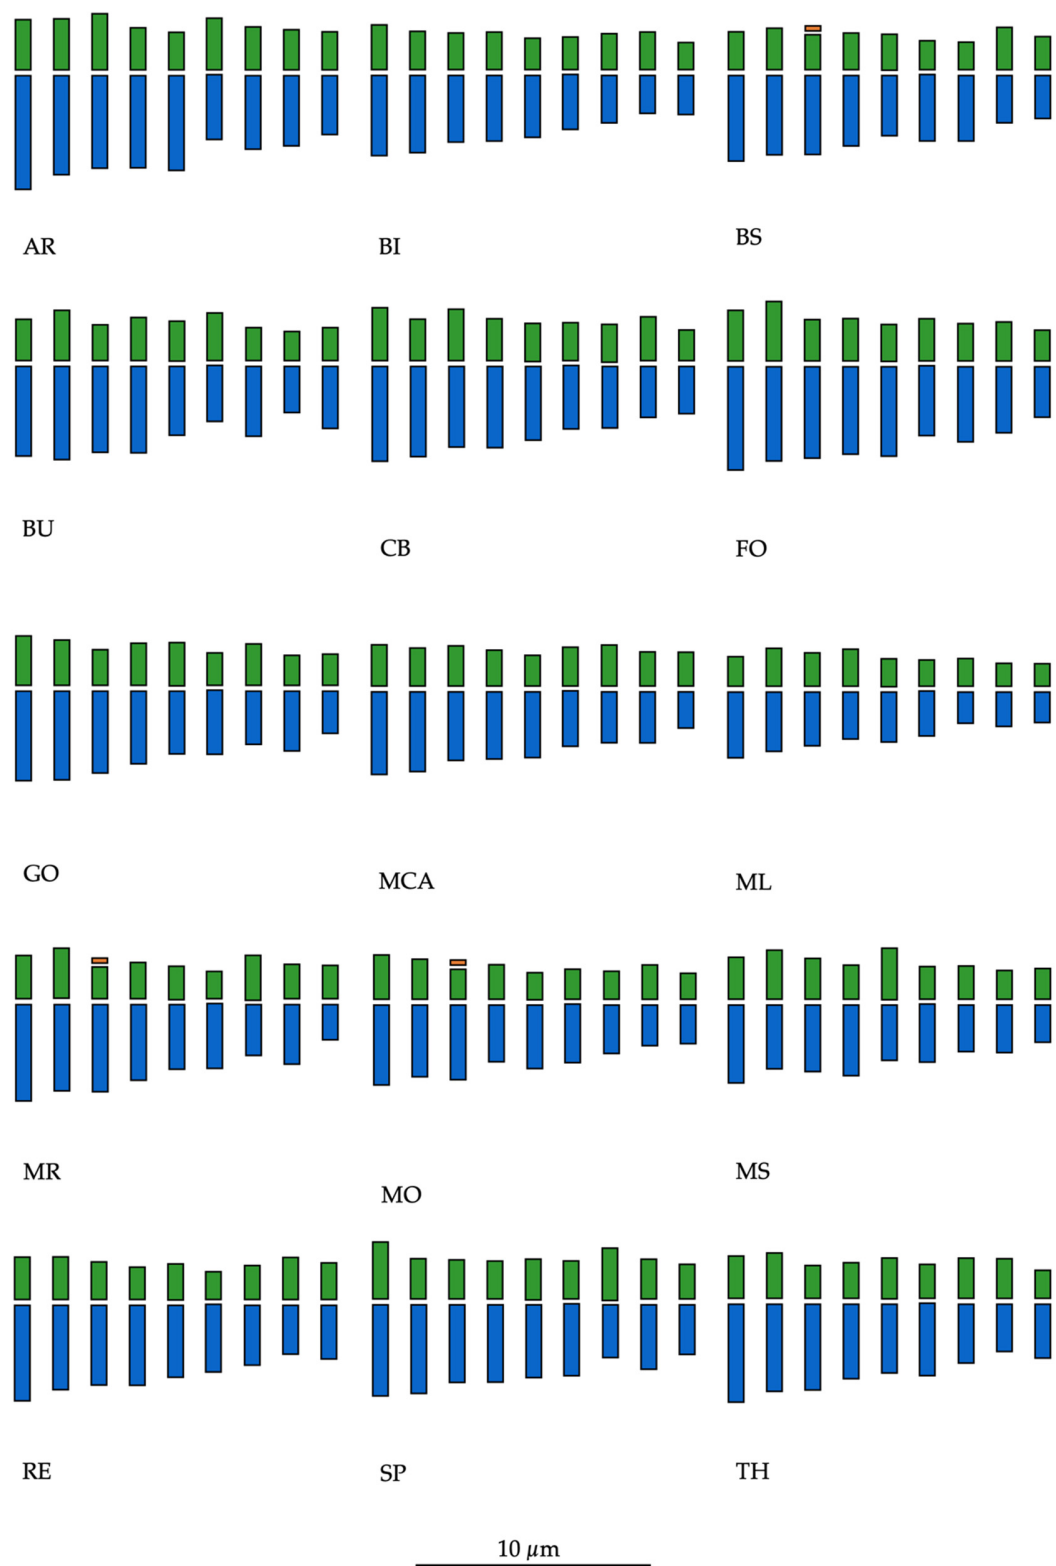

**Figure S1.** Haploid idiograms of the 15 populations of *Armeria* taxa endemic to Sardinia and Corsica considered in this study. Green = short arm; blue = long arm.

**Table S2.** Results of IDL tests for all the molecular markers used in the study of *Armeria* taxa endemic to Sardinia and Corsica.

|            | I<br>(ITS) | H<br>( <i>trnH-psbA</i> ) | L<br>( <i>trnL-rpl32</i> ) | Q<br>( <i>trnQ-rps16</i> ) | S<br>( <i>trnL-trnF</i> ) | HLSQ<br>(concatenated) |
|------------|------------|---------------------------|----------------------------|----------------------------|---------------------------|------------------------|
| I<br>(ITS) | --         | OK(0.1287)                | OK(0.9109)                 | OK(0.4356)                 | OK(0.1386)                | OK(0.7426)             |



**Table S3.** Mean Decrease Accuracy of Random Forest for each of the 26 seed morphological variables of *Armeria* taxa endemic to Sardinia and Corsica considered in the model.

| <b>Variable</b> | <b>Mean<br/>Decrease<br/>Accuracy</b> |
|-----------------|---------------------------------------|
| MaxR            | 76.841325                             |
| Concavity       | 73.343255                             |
| Feret           | 69.508661                             |
| MBCRadius       | 63.924422                             |
| CHull           | 61.394428                             |
| Area            | 59.759716                             |
| Shape           | 59.076689                             |
| Perim           | 58.433220                             |
| Pixels          | 58.325549                             |
| PerEquivD       | 54.647571                             |
| CArea           | 54.630781                             |
| Breadth         | 54.478435                             |
| ArEquivD        | 51.748297                             |
| ArBBox          | 51.102961                             |
| EquivEllAr      | 48.740610                             |
| MinR            | 46.627972                             |
| Convexity       | 37.596910                             |
| AspRatio        | 29.487634                             |
| Solidity        | 27.080916                             |
| Circ            | 13.543970                             |
| RFactor         | 12.157895                             |
| Sphericity      | 7.808802                              |
| Roundness       | 7.179891                              |
| Compactness     | 7.104000                              |
| ModRatio        | 6.009653                              |
| Rectang         | 5.101275                              |

**Table S4.** List of the 26 seed morphometric features measured in *Armeria* taxa endemic to Sardinia and Corsica.

| Features    | Description                                                                             |
|-------------|-----------------------------------------------------------------------------------------|
| Perim       | Perimeter, calculated from the centres of the boundary pixels                           |
| Area        | Area inside the polygon defined by the perimeter                                        |
| Pixels      | Number of pixels forming the endocarp image                                             |
| MinR        | Radius of the inscribed circle centred at the middle of the seed                        |
| MaxR        | Radius of the enclosing circle centred at the middle of the seed                        |
| Feret       | Largest axis length                                                                     |
| Breadth     | Largest axis perpendicular to Feret                                                     |
| CHull       | Convex hull or convex polygon calculated from pixel centres                             |
| CArea       | Area of the convex hull polygon                                                         |
| MBCRadius   | Radius of the minimal bounding circle                                                   |
| AspRatio    | Aspect ratio = Feret/Breadth                                                            |
| Circ        | Circularity = $4\pi \times \text{Area} / \text{Perimeter}^2$                            |
| Roundness   | Roundness = $4 \times \text{Area} / (\pi \times \text{Feret}^2)$                        |
| ArEquivD    | Area equivalent diameter = $\sqrt{(4/\pi) \times \text{Area}}$                          |
| PerEquivD   | Perimeter equivalent diameter = $\text{Area} / \pi$                                     |
| EquivEllAr  | Equivalent ellipse area = $(\pi \times \text{Feret} \cdot \text{Breadth}) / 4$          |
| Compactness | Compactness = $\sqrt{((4/\pi) \times \text{Area})} / \text{Feret}$                      |
| Solidity    | Solidity = $\text{Area} / \text{Convex Area}$                                           |
| Concavity   | Concavity = $\text{Convex Area} - \text{Area}$                                          |
| Convexity   | Convexity = $\text{Convex hull} / \text{Perimeter}$                                     |
| Shape       | Shape = $\text{Perimeter}^2 / \text{Area}$                                              |
| RFactor     | RFactor = $\text{Convex Hull} / (\text{Feret} \times \pi)$                              |
| ModRatio    | Modification ratio = $(2 \times \text{MinR}) / \text{Feret}$                            |
| Sphericity  | Sphericity = $\text{MinR} / \text{MaxR}$                                                |
| ArBBox      | Area of the bounding box along the feret diameter = $\text{Feret} \cdot \text{Breadth}$ |
| Rectang     | Rectangularity = $\text{Area} / \text{ArBBox}$                                          |

**Table S5.** Descriptive statistics of the five most important seed morphometric features in *Armeria* taxa endemic to Sardinia and Corsica, found by Random Forest.

| Population | MaxR        | Concavity     | Feret        | MBCRadius   | CHull        |
|------------|-------------|---------------|--------------|-------------|--------------|
| AR         | 55.7 ± 4.3  | 131.3 ± 123.7 | 107.6 ± 7.6  | 53.8 ± 3.8  | 246.4 ± 15.4 |
| BS         | 50.7 ± 4.7  | 164.5 ± 78.6  | 96.9 ± 10.0  | 48.5 ± 4.8  | 226.8 ± 18.2 |
| BU         | 52.5 ± 11.1 | 155.8 ± 195.3 | 99.2 ± 21.4  | 49.6 ± 10.7 | 225.8 ± 41.3 |
| CB         | 58.1 ± 4.1  | 110.4 ± 59.1  | 111.7 ± 7.6  | 55.9 ± 3.8  | 253.6 ± 14.0 |
| FO         | 16.7 ± 0.8  | 14.8 ± 3.4    | 32.4 ± 1.5   | 16.2 ± 0.7  | 74.3 ± 2.6   |
| GO         | 56.8 ± 4.7  | 129.6 ± 100.3 | 109.1 ± 8.1  | 54.5 ± 4.0  | 250.1 ± 17.2 |
| MCA        | 61.2 ± 7.8  | 172.3 ± 595.4 | 116.4 ± 11.7 | 58.2 ± 5.9  | 263.0 ± 26.7 |
| ML         | 51.8 ± 6.1  | 133.6 ± 244.4 | 99.3 ± 11.5  | 49.6 ± 5.8  | 227.6 ± 26.9 |
| MO         | 59.2 ± 6.4  | 190.0 ± 238.2 | 113.9 ± 12.1 | 56.9 ± 6.0  | 258.9 ± 25.3 |
| MR         | 60.3 ± 5.1  | 115.3 ± 82.1  | 114.6 ± 9.6  | 57.3 ± 4.8  | 260.9 ± 20.4 |
| MS         | 55.1 ± 3.9  | 96.6 ± 45.3   | 106.0 ± 6.9  | 53.0 ± 3.5  | 241.2 ± 14.5 |
| RE         | 50.8 ± 4.3  | 241.8 ± 222.2 | 97.3 ± 8.1   | 48.7 ± 4.0  | 224.9 ± 18.8 |
| SP         | 16.5 ± 1.5  | 15.6 ± 4.2    | 31.7 ± 3.0   | 15.9 ± 1.5  | 73.2 ± 5.7   |
| TH         | 59.3 ± 3.5  | 195.8 ± 192.6 | 116.5 ± 6.8  | 58.3 ± 3.4  | 270.7 ± 16.8 |

**Table S6.** Confusion matrix from the tuned Random Forest model on the current taxonomic hypothesis for the seed morphometric data in *Armeria* taxa endemic to Sardinia and Corsica.

|                                                          | A.<br><i>leucocephala</i><br>subsp.<br><i>breviaristata</i> | A.<br><i>leucocephala</i><br>subsp.<br><i>leucocephala</i> | A.<br><i>leucocephala</i><br>subsp.<br><i>pubescens</i> | <i>A. morisii</i> | <i>A. multiceps</i><br>subsp.<br><i>meridionalis</i> | <i>A. multiceps</i><br>subsp.<br><i>multiceps</i> | <i>A. sardoa</i><br>subsp.<br><i>genargentea</i> | <i>A. sardoa</i><br>subsp. <i>sardoa</i> | <i>A. soleirolii</i> | <i>A. sulcitana</i> | Class Error |
|----------------------------------------------------------|-------------------------------------------------------------|------------------------------------------------------------|---------------------------------------------------------|-------------------|------------------------------------------------------|---------------------------------------------------|--------------------------------------------------|------------------------------------------|----------------------|---------------------|-------------|
| <i>A. leucocephala</i><br>subsp.<br><i>breviaristata</i> | <b>32</b>                                                   | 9                                                          | 10                                                      | 0                 | 9                                                    | 2                                                 | 1                                                | 25                                       | 1                    | 11                  | 0.68        |
| <i>A. leucocephala</i><br>subsp.<br><i>leucocephala</i>  | 8                                                           | <b>34</b>                                                  | 26                                                      | 2                 | 8                                                    | 5                                                 | 0                                                | 13                                       | 1                    | 3                   | 0.66        |
| <i>A. leucocephala</i><br>subsp.<br><i>pubescens</i>     | 15                                                          | 25                                                         | <b>39</b>                                               | 2                 | 19                                                   | 14                                                | 0                                                | 20                                       | 1                    | 8                   | 0.72        |
| <i>A. morisii</i>                                        | 0                                                           | 3                                                          | 2                                                       | <b>65</b>         | 3                                                    | 4                                                 | 0                                                | 7                                        | 1                    | 8                   | 0.30        |
| <i>A. multiceps</i><br>subsp.<br><i>meridionalis</i>     | 13                                                          | 2                                                          | 24                                                      | 5                 | <b>23</b>                                            | 7                                                 | 0                                                | 16                                       | 0                    | 10                  | 0.77        |
| <i>A. multiceps</i><br>subsp.<br><i>multiceps</i>        | 8                                                           | 5                                                          | 22                                                      | 7                 | 13                                                   | <b>20</b>                                         | 3                                                | 10                                       | 8                    | 6                   | 0.80        |
| <i>A. sardoa</i><br>subsp.<br><i>genargentea</i>         | 0                                                           | 0                                                          | 0                                                       | 1                 | 0                                                    | 0                                                 | <b>51</b>                                        | 11                                       | 6                    | 28                  | 0.47        |
| <i>A. sardoa</i><br>subsp.<br><i>sardoa</i>              | 22                                                          | 6                                                          | 9                                                       | 9                 | 15                                                   | 3                                                 | 1                                                | <b>296</b>                               | 31                   | 14                  | 0.27        |
| <i>A. soleirolii</i>                                     | 1                                                           | 0                                                          | 2                                                       | 0                 | 0                                                    | 1                                                 | 0                                                | 40                                       | <b>59</b>            | 1                   | 0.43        |
| <i>A. sulcitana</i>                                      | 12                                                          | 3                                                          | 6                                                       | 11                | 9                                                    | 6                                                 | 27                                               | 19                                       | 3                    | <b>104</b>          | 0.48        |



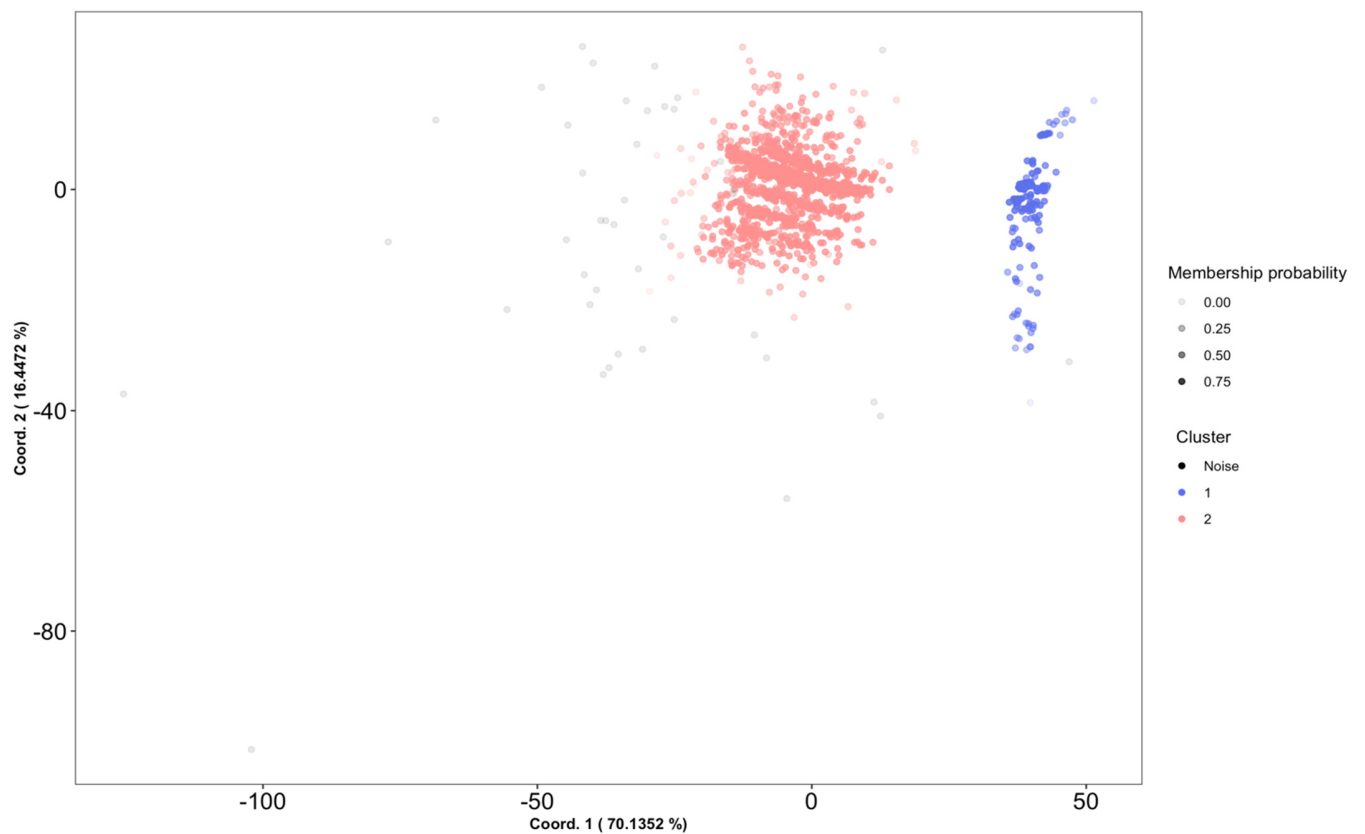

**Figure S3.** PCoA based on the Manhattan distance of the 26 seed morphometric features in *Armeria* taxa endemic to Sardinia and Corsica, colored based on the results of HDBSCAN\* clustering algorithm. The first two axes of PCoA retained more than 86% of the variation. Likelihood of belonging to one of the two cluster, estimated from the PDF obtained by HBSCAN\*, is also represented as transparency of the points. The 42 seeds considered as potential outliers are also represented.

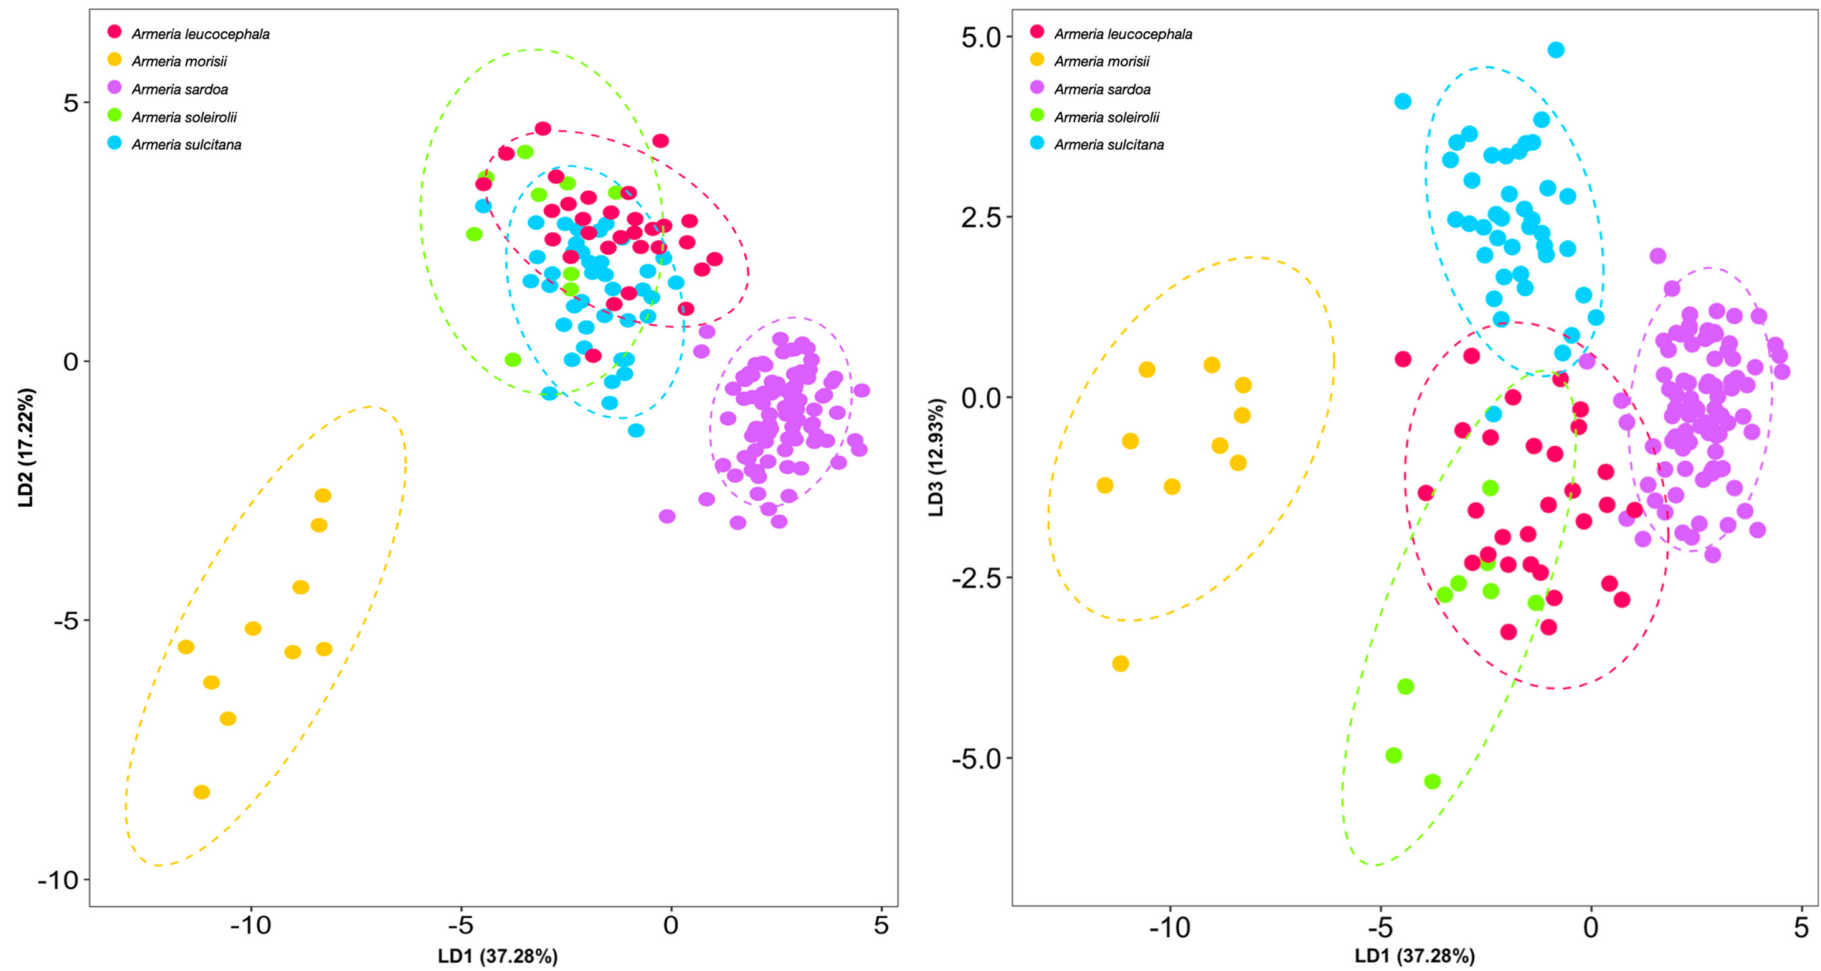

**Figure S4.** Canonical Variate Analysis of the morphometric dataset of *Armeria* taxa endemic to Sardinia and Corsica, composed by numeric variables grouped based on the new taxonomic circumscription. 95% Confidence Ellipses are drawn assuming a *t*-distribution of points.

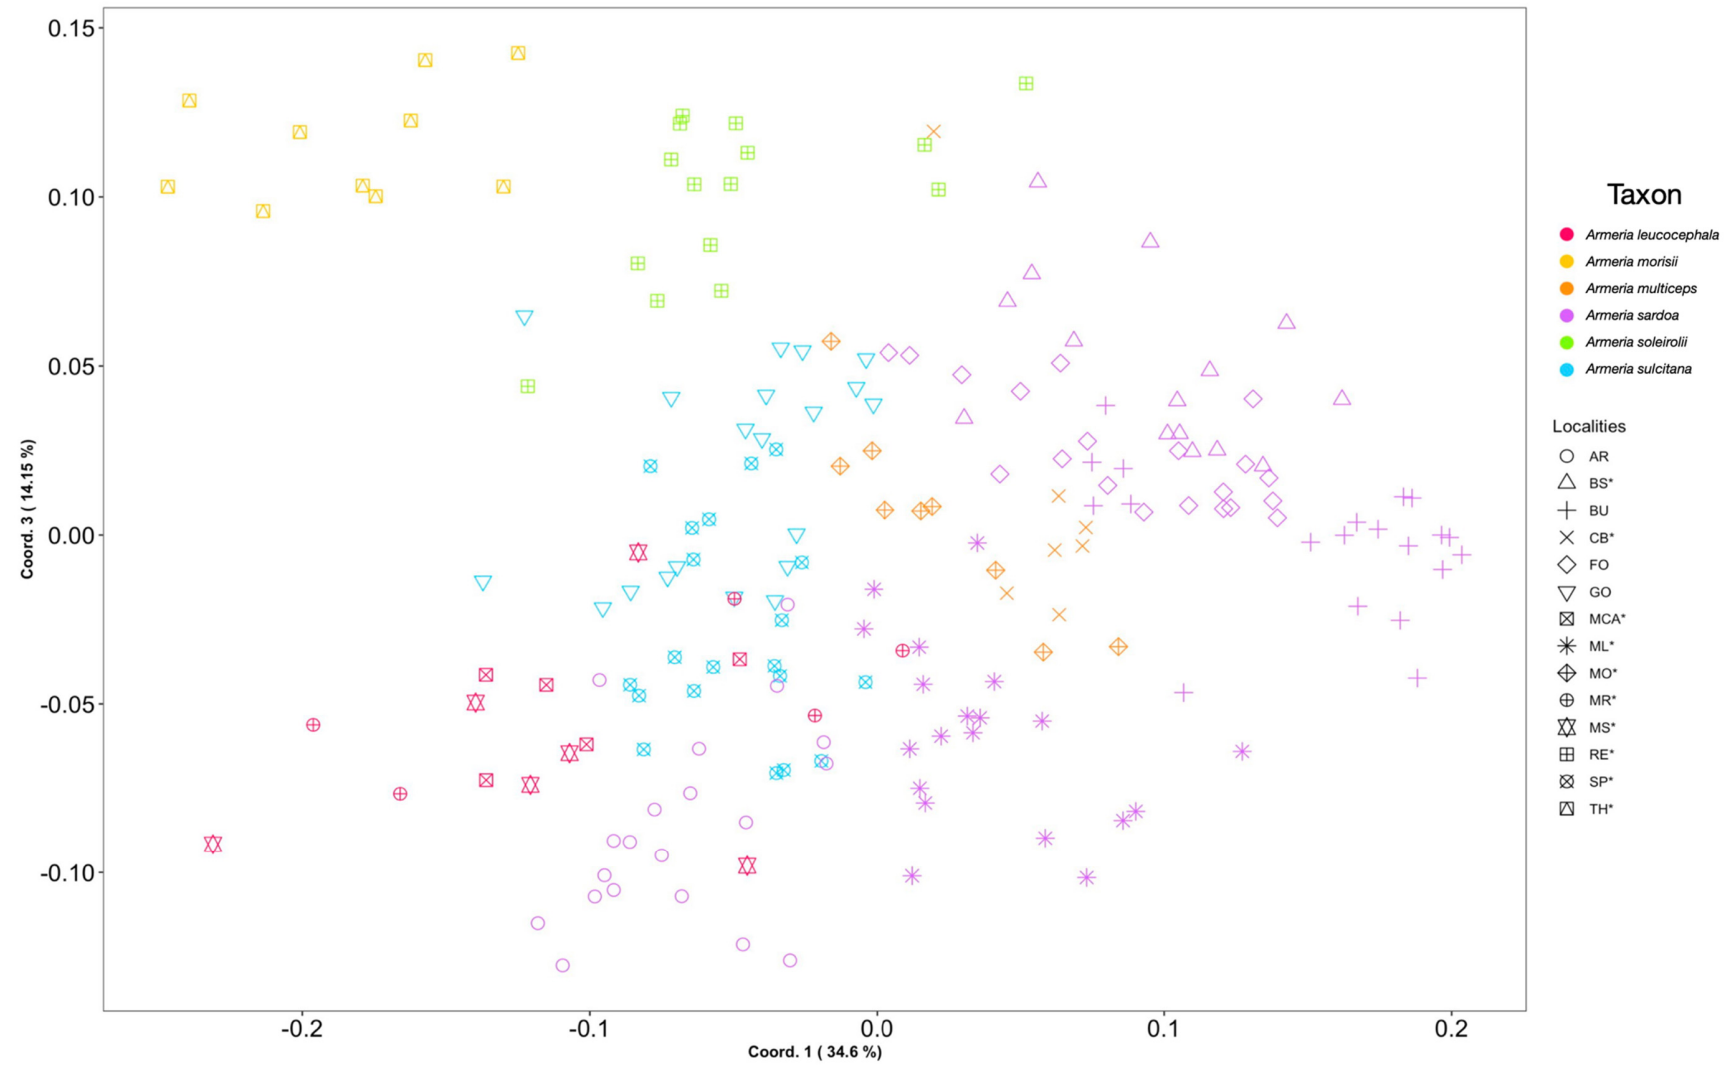

**Figure S5.** PCoA illustrating the morphometric variation of the first and third axes in *Armeria* taxa endemic to Sardinia and Corsica, based on the Gower distance of the 49 characters measured. Symbols indicates the acronym of the population localities (Table 1), whereas colours indicate the taxa at species level. Asterisk = type localities.

**Table S7.** Confusion matrix for the *Armeria* taxa endemic to Sardinia and Corsica, based on the current taxonomic hypothesis.

|                                                       | <i>A.</i><br><i>leucocephala</i><br>subsp.<br><i>breviaristata</i> | <i>A.</i><br><i>leucocephala</i><br>subsp.<br><i>leucocephala</i> | <i>A.</i><br><i>leucocephala</i><br>subsp.<br><i>pubescens</i> | <i>A. morisii</i> | <i>A. multiceps</i><br>subsp.<br><i>meridionalis</i> | <i>A. multiceps</i><br>subsp.<br><i>multiceps</i> | <i>A. sardoa</i><br>subsp.<br><i>sardoa</i> | <i>A. sardoa</i><br>subsp.<br><i>genargentea</i> | <i>A.</i><br><i>soleirolii</i> | <i>A.</i><br><i>sulcitana</i> |
|-------------------------------------------------------|--------------------------------------------------------------------|-------------------------------------------------------------------|----------------------------------------------------------------|-------------------|------------------------------------------------------|---------------------------------------------------|---------------------------------------------|--------------------------------------------------|--------------------------------|-------------------------------|
| <i>A. leucocephala</i> subsp.<br><i>breviaristata</i> | <b>2</b>                                                           | 2                                                                 | 1                                                              | 0                 | 0                                                    | 0                                                 | 0                                           | 0                                                | 0                              | 0                             |
| <i>A. leucocephala</i> subsp.<br><i>leucocephala</i>  | 0                                                                  | <b>1</b>                                                          | 0                                                              | 0                 | 0                                                    | 0                                                 | 0                                           | 0                                                | 0                              | 0                             |
| <i>A. leucocephala</i> subsp.<br><i>pubescens</i>     | 1                                                                  | 1                                                                 | <b>4</b>                                                       | 0                 | 0                                                    | 0                                                 | 0                                           | 0                                                | 0                              | 0                             |
| <i>A. morisii</i>                                     | 0                                                                  | 0                                                                 | 0                                                              | <b>10</b>         | 0                                                    | 0                                                 | 0                                           | 0                                                | 0                              | 0                             |
| <i>A. multiceps</i> subsp.<br><i>meridionalis</i>     | 0                                                                  | 0                                                                 | 0                                                              | 0                 | <b>6</b>                                             | 1                                                 | 0                                           | 0                                                | 0                              | 0                             |
| <i>A. multiceps</i> subsp.<br><i>multiceps</i>        | 0                                                                  | 1                                                                 | 0                                                              | 0                 | 0                                                    | <b>7</b>                                          | 0                                           | 0                                                | 0                              | 0                             |
| <i>A. sardoa</i> subsp.<br><i>sardoa</i>              | 0                                                                  | 0                                                                 | 0                                                              | 0                 | 0                                                    | 0                                                 | <b>35</b>                                   | 1                                                | 0                              | 0                             |
| <i>A. sardoa</i> subsp.<br><i>genargentea</i>         | 0                                                                  | 0                                                                 | 0                                                              | 0                 | 0                                                    | 1                                                 | 0                                           | <b>55</b>                                        | 0                              | 0                             |
| <i>A. soleirolii</i>                                  | 0                                                                  | 0                                                                 | 0                                                              | 0                 | 0                                                    | 0                                                 | 0                                           | 0                                                | <b>9</b>                       | 0                             |
| <i>A. sulcitana</i>                                   | 2                                                                  | 0                                                                 | 0                                                              | 0                 | 0                                                    | 0                                                 | 0                                           | 2                                                | 0                              | <b>40</b>                     |

**Table S8.** Confusion matrix of the morphometric data in *Armeria* taxa endemic to Sardinia and Corsica, according to the tuned kNN model under the alternative taxonomic hypothesis 1 (6 species, no subspecies).

|                        | <i>A.<br/>leucocephala</i> | <i>A.<br/>morisii</i> | <i>A.<br/>multiceps</i> | <i>A.<br/>sardoa</i> | <i>A.<br/>soleirolii</i> | <i>A.<br/>sulcitana</i> |
|------------------------|----------------------------|-----------------------|-------------------------|----------------------|--------------------------|-------------------------|
| <i>A. leucocephala</i> | <b>12</b>                  | 0                     | 0                       | 0                    | 0                        | 0                       |
| <i>A. morisii</i>      | 0                          | <b>10</b>             | 0                       | 0                    | 0                        | 0                       |
| <i>A. multiceps</i>    | 2                          | 0                     | <b>15</b>               | 0                    | 0                        | 0                       |
| <i>A. sardoa</i>       | 0                          | 0                     | 0                       | <b>91</b>            | 0                        | 0                       |
| <i>A. soleirolii</i>   | 0                          | 0                     | 0                       | 0                    | <b>9</b>                 | 0                       |
| <i>A. sulcitana</i>    | 1                          | 0                     | 0                       | 2                    | 0                        | <b>40</b>               |

**Table S9.** Confusion matrix of the morphometric data in *Armeria* taxa endemic to Sardinia and Corsica, according to the tuned kNN model under the alternative taxonomic hypothesis 2 (five species, no subspecies).

|                        | <i>A.<br/>leucocephala</i> | <i>A.<br/>morisii</i> | <i>A.<br/>sardoa</i> | <i>A.<br/>soleirolii</i> | <i>A.<br/>sulcitana</i> |
|------------------------|----------------------------|-----------------------|----------------------|--------------------------|-------------------------|
| <i>A. leucocephala</i> | <b>28</b>                  | 0                     | 0                    | 0                        | 0                       |
| <i>A. morisii</i>      | 0                          | <b>10</b>             | 0                    | 0                        | 0                       |
| <i>A. sardoa</i>       | 0                          | 0                     | <b>92</b>            | 0                        | 0                       |
| <i>A. soleirolii</i>   | 0                          | 0                     | 0                    | <b>9</b>                 | 0                       |
| <i>A. sulcitana</i>    | 2                          | 0                     | 1                    | 0                        | <b>40</b>               |

**Table S10.** Descriptive statistics for the continuous characters according to the new taxonomic circumscription of *Armeria* taxa endemic to Sardinia and Corsica. Some individuals have been removed due to the presence of missing values.

| Species                | n  | HEIGHT            | SCAP_NUM      | SCA LENG       | SCA DIAM           | WIDTH_IAL_WI<br>N | ANG_WIN_TIP  | LENG_WIN_LE<br>AF | WIDTH_WIN_L<br>EAF    |
|------------------------|----|-------------------|---------------|----------------|--------------------|-------------------|--------------|-------------------|-----------------------|
| <i>A. leucocephala</i> | 30 | 195.74 ± 93.75    | 4.03 ± 3.10   | 155.37 ± 86.45 | 1.05 ± 0.35        | 0.04 ± 0.02       | 20.75 ± 2.38 | 36.71 ± 23.78     | 1.11 ± 0.40           |
| <i>A. morisii</i>      | 10 | 275.08 ± 29.39    | 3.60 ± 1.43   | 230.01 ± 46.84 | 1.34 ± 0.21        | 0.09 ± 0.04       | 52.64 ± 4.13 | 39.85 ± 19.44     | 5.08 ± 1.31           |
| <i>A. sardoa</i>       | 93 | 200.91 ± 90.02    | 7.83 ± 5.03   | 163.54 ± 76.46 | 0.92 ± 0.25        | 0.03 ± 0.02       | 27.69 ± 9.22 | 28.19 ± 17.48     | 1.75 ± 0.63           |
| <i>A. soleirolii</i>   | 9  | 195.00 ± 44.06    | 2.67 ± 1.50   | 168.67 ± 41.18 | 0.86 ± 0.17        | 0.08 ± 0.13       | 23.20 ± 6.04 | 36.39 ± 19.04     | 1.69 ± 0.37           |
| <i>A. sulcitana</i>    | 40 | 300.62 ± 41.19    | 7.58 ± 4.70   | 257.61 ± 41.80 | 1.22 ± 0.22        | 0.02 ± 0.02       | 24.61 ± 4.40 | 35.12 ± 9.97      | 1.71 ± 0.54           |
| Species                | n  | WIDTH_IAL_<br>SUM | ANG_SUM_<br>P | LENG_SUM_<br>F | WIDTH_SUM_<br>LEAF | N_SUM_VEINS       | SHEATH LENG  | DIAM_CAP          | LENG_OUT_IN<br>V_BRAC |
| <i>A. leucocephala</i> | 30 | 0.03 ± 0.02       | 21.63 ± 3.28  | 42.34 ± 26.24  | 1.25 ± 0.38        | 2.50 ± 0.94       | 8.94 ± 3.33  | 14.01 ± 3.77      | 4.89 ± 1.11           |
| <i>A. morisii</i>      | 10 | 0.07 ± 0.03       | 44.02 ± 6.02  | 46.02 ± 14.47  | 4.98 ± 1.31        | 3.60 ± 0.97       | 12.98 ± 2.79 | 18.42 ± 2.66      | 7.07 ± 1.06           |
| <i>A. sardoa</i>       | 93 | 0.03 ± 0.03       | 19.45 ± 4.42  | 38.68 ± 23.30  | 1.10 ± 0.37        | 2.66 ± 0.96       | 8.07 ± 2.27  | 11.43 ± 2.70      | 4.95 ± 0.89           |
| <i>A. soleirolii</i>   | 9  | 0.03 ± 0.01       | 31.53 ± 11.47 | 46.03 ± 15.02  | 1.71 ± 0.58        | 3.00 ± 0.00       | 9.67 ± 1.71  | 15.66 ± 1.77      | 3.72 ± 0.75           |
| <i>A. sulcitana</i>    | 40 | 0.02 ± 0.02       | 19.26 ± 1.56  | 51.99 ± 16.15  | 1.34 ± 0.49        | 3.20 ± 0.76       | 9.95 ± 3.17  | 13.21 ± 1.76      | 4.83 ± 0.76           |

Table S10. continued.

| Species                | n  | WIDTH_OUTER_INV_BRACT | LENGTH_INNER_INV_BRACT | WIDTH_INNER_INV_BRACT | LENGTH_INNER_INV_BRACT | WIDTH_INNER_INV_BRACT | N_INNER_INV_BRACT | LENGTH_OUTER_SPI_BRACT | WIDTH_OUTER_SPI_BRACT | LENGTH_OUTER_SPI_BRACT | WIDTH_OUTER_SPI_BRACT |
|------------------------|----|-----------------------|------------------------|-----------------------|------------------------|-----------------------|-------------------|------------------------|-----------------------|------------------------|-----------------------|
| <i>A. leucocephala</i> | 30 | 2.75 ± 0.76           | 5.71 ± 1.45            | 2.77 ± 0.83           | 6.54 ± 1.23            | 2.82 ± 0.48           | 7.67 ± 1.60       | 7.17 ± 1.07            | 4.45 ± 0.71           | 5.00 ± 0.85            | 3.29 ± 0.84           |
| <i>A. morisii</i>      | 10 | 3.84 ± 0.49           | 10.12 ± 1.29           | 4.58 ± 0.70           | 9.70 ± 0.70            | 4.03 ± 0.69           | 9.30 ± 1.49       | 9.50 ± 0.98            | 5.71 ± 0.55           | 6.13 ± 0.52            | 4.29 ± 0.42           |
| <i>A. sardoa</i>       | 93 | 2.59 ± 0.81           | 4.78 ± 0.99            | 2.24 ± 0.65           | 3.73 ± 0.68            | 1.78 ± 0.54           | 8.65 ± 1.50       | 5.91 ± 0.93            | 3.24 ± 0.81           | 4.09 ± 0.78            | 2.53 ± 0.61           |
| <i>A. soleirolii</i>   | 9  | 2.09 ± 0.35           | 4.53 ± 0.65            | 3.49 ± 0.61           | 6.43 ± 1.07            | 3.76 ± 0.52           | 9.44 ± 1.59       | 6.85 ± 0.50            | 4.81 ± 0.78           | 4.91 ± 0.67            | 3.28 ± 0.37           |
| <i>A. sulcitana</i>    | 40 | 2.52 ± 0.47           | 6.37 ± 1.31            | 3.00 ± 0.54           | 6.75 ± 1.00            | 3.08 ± 0.73           | 9.32 ± 2.08       | 6.96 ± 0.65            | 4.45 ± 0.72           | 4.53 ± 0.48            | 2.91 ± 0.60           |

| Species                | n  | LENGTH_INNER_SPI_BRACT | WIDTH_INNER_SPI_BRACT | LENGTH_INNER_SPI_BRACT | WIDTH_INNER_SPI_BRACT | LENGTH_CAL_PED | LENGTH_CAL_TUBE | WIDTH_CAL_TUBE | LIMB_LEN_G  | AWN_LEN_G   |
|------------------------|----|------------------------|-----------------------|------------------------|-----------------------|----------------|-----------------|----------------|-------------|-------------|
| <i>A. leucocephala</i> | 30 | 6.63 ± 1.24            | 4.12 ± 1.13           | 4.47 ± 0.84            | 2.74 ± 0.52           | 1.35 ± 0.30    | 2.58 ± 0.45     | 1.32 ± 0.32    | 2.38 ± 0.40 | 0.63 ± 0.27 |
| <i>A. morisii</i>      | 10 | 8.97 ± 0.96            | 4.86 ± 0.36           | 6.12 ± 0.94            | 3.74 ± 0.42           | 1.36 ± 0.22    | 2.74 ± 0.29     | 1.06 ± 0.10    | 2.45 ± 0.23 | 1.31 ± 0.18 |
| <i>A. sardoa</i>       | 93 | 5.50 ± 0.88            | 3.11 ± 0.63           | 3.84 ± 0.82            | 2.41 ± 0.47           | 1.15 ± 0.35    | 2.31 ± 0.51     | 1.26 ± 0.42    | 2.01 ± 0.50 | 0.44 ± 0.16 |
| <i>A. soleirolii</i>   | 9  | 7.41 ± 0.75            | 4.84 ± 0.73           | 5.45 ± 0.94            | 3.37 ± 0.35           | 1.33 ± 0.30    | 2.59 ± 0.21     | 1.19 ± 0.39    | 1.88 ± 0.59 | 0.62 ± 0.08 |
| <i>A. sulcitana</i>    | 40 | 6.30 ± 0.69            | 3.75 ± 0.53           | 4.13 ± 0.57            | 2.61 ± 0.55           | 1.39 ± 0.42    | 2.25 ± 0.28     | 1.23 ± 0.25    | 1.91 ± 0.36 | 0.77 ± 0.17 |

**Table S11.** Contingency tables of most significant categorical characters used in the identification key to *Armeria* taxa endemic to Sardinia and Corsica. Significance according to Fisher's exact test.

| PAP_CELL        | <i>A. leucocephala</i> | <i>A. morisii</i> | <i>A. sardoa</i> | <i>A. soleirolii</i> | <i>A. sulcitana</i> |
|-----------------|------------------------|-------------------|------------------|----------------------|---------------------|
| Yes             | 0                      | 0                 | 0                | 15                   | 0                   |
| No              | 32                     | 10                | 95               | 0                    | 40                  |
| Significance    | a                      | a                 | a                | b                    | a                   |
| DIMORF          | <i>A. leucocephala</i> | <i>A. morisii</i> | <i>A. sardoa</i> | <i>A. soleirolii</i> | <i>A. sulcitana</i> |
| Homomorphic     | 31                     | 10                | 18               | 9                    | 10                  |
| Dimorphic       | 1                      | 0                 | 77               | 6                    | 30                  |
| Significance    | a                      | a                 | b                | a                    | b                   |
| MAR_SUM_LEAF    | <i>A. leucocephala</i> | <i>A. morisii</i> | <i>A. sardoa</i> | <i>A. soleirolii</i> | <i>A. sulcitana</i> |
| Smooth          | 18                     | 10                | 44               | 15                   | 40                  |
| Dentate         | 14                     | 0                 | 51               | 0                    | 0                   |
| Significance    | a                      | b                 | a                | b                    | b                   |
| CALYX_HAIRINESS | <i>A. leucocephala</i> | <i>A. morisii</i> | <i>A. sardoa</i> | <i>A. soleirolii</i> | <i>A. sulcitana</i> |
| Holotrichous    | 1                      | 10                | 35               | 0                    | 0                   |
| Pleurotrichous  | 30                     | 0                 | 60               | 9                    | 40                  |
| Significance    | a                      | b                 | c                | a                    | a                   |



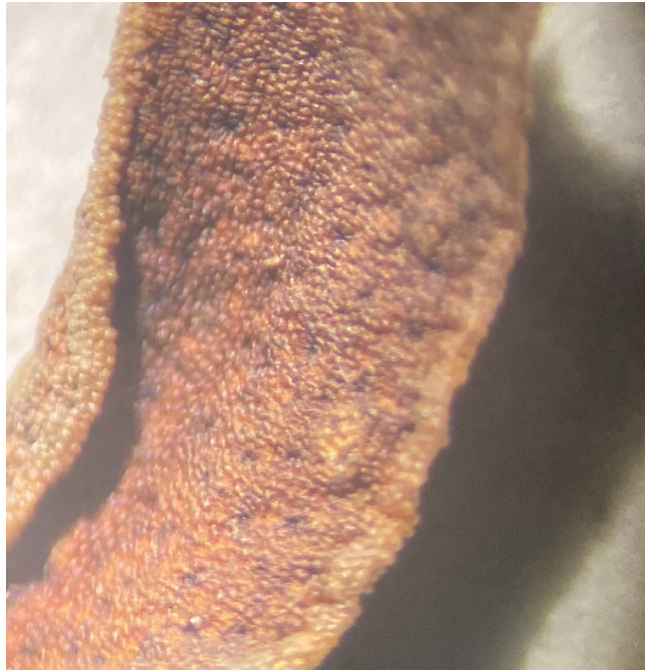

**Figure S6.** Leaf surface of *Armeria soleiroliae* and its papillate epidermal cells.
